# Supplementary material for: Temporal regulation of gene expression through integration of p53 dynamics and modifications
Source: PubMed Central journal article supplement — Sci Adv. 2024 Oct 25;10(43):eadp2229. doi: 10.1126/sciadv.adp2229 (PMC11506164; doi:10.1126/sciadv.adp2229), 2024-10-25
Supplement: sciadv.adp2229_sm.pdf [file sciadv.adp2229_sm.pdf]

Supplementary Materials for  
**Temporal regulation of gene expression through integration of p53 dynamics  
and modifications**

Dan Lu *et al.*

Corresponding author: Galit Lahav, galit@hms.harvard.edu

*Sci. Adv.* **10**, eadp2229 (2024)  
DOI: 10.1126/sciadv.adp2229

**The PDF file includes:**

Figs. S1 to S4  
Legend for table S1  
References

**Other Supplementary Material for this manuscript includes the following:**

Table S1

## Figure S1

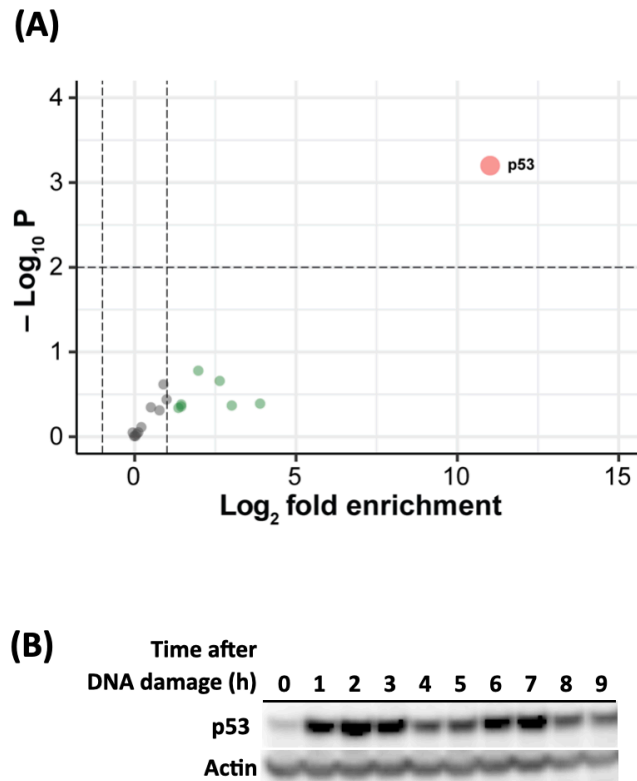

**Fig. S1: p53 immunoprecipitation and dynamics in cells.** (A) Magnetic beads were conjugated with either PAB1801 or an isotype control. Captured proteins were in-solution digested and peptides were analyzed by Liquid Chromatography with Tandem Mass Spectrometry (LC-MS/MS). Abundance was measured by label free quantification. The fold enrichment was calculated for immunoprecipitations using anti-p53 antibody compared to isotype control. (n=3 biological replicates; p-value represents Bonferroni-corrected values following t-test of the abundance values for each protein). (B) Western blot of total p53 levels at the indicated time points after 10 Gy X-ray irradiation of MCF7 cells. Actin is shown as a loading control.

## Figure S2

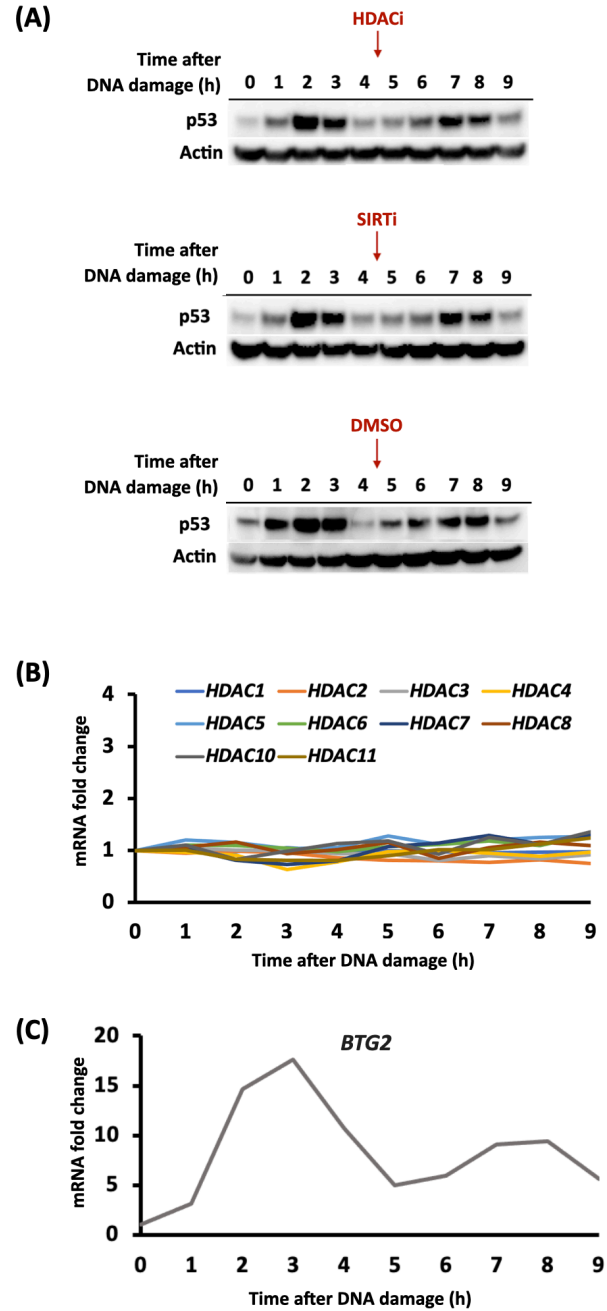

**Fig. S2: Effects of deacetylase inhibitors on p53 dynamics, and expression patterns of acetylation regulators** (A) Western blot of p53 levels at the indicated timepoints after 10 Gy X-ray irradiation. HDACi, SIRTi or DMSO control was added at 4.5 h, corresponding to the trough between the first two peaks of p53 expression. Actin is shown as a loading control. (B-C) Expression levels based on RNA-Seq of (B) HDAC family enzymes or (C) *BTG2* following DNA damage (source data obtained from Jiménez et al. 2022 (22)).

**Figure S3**

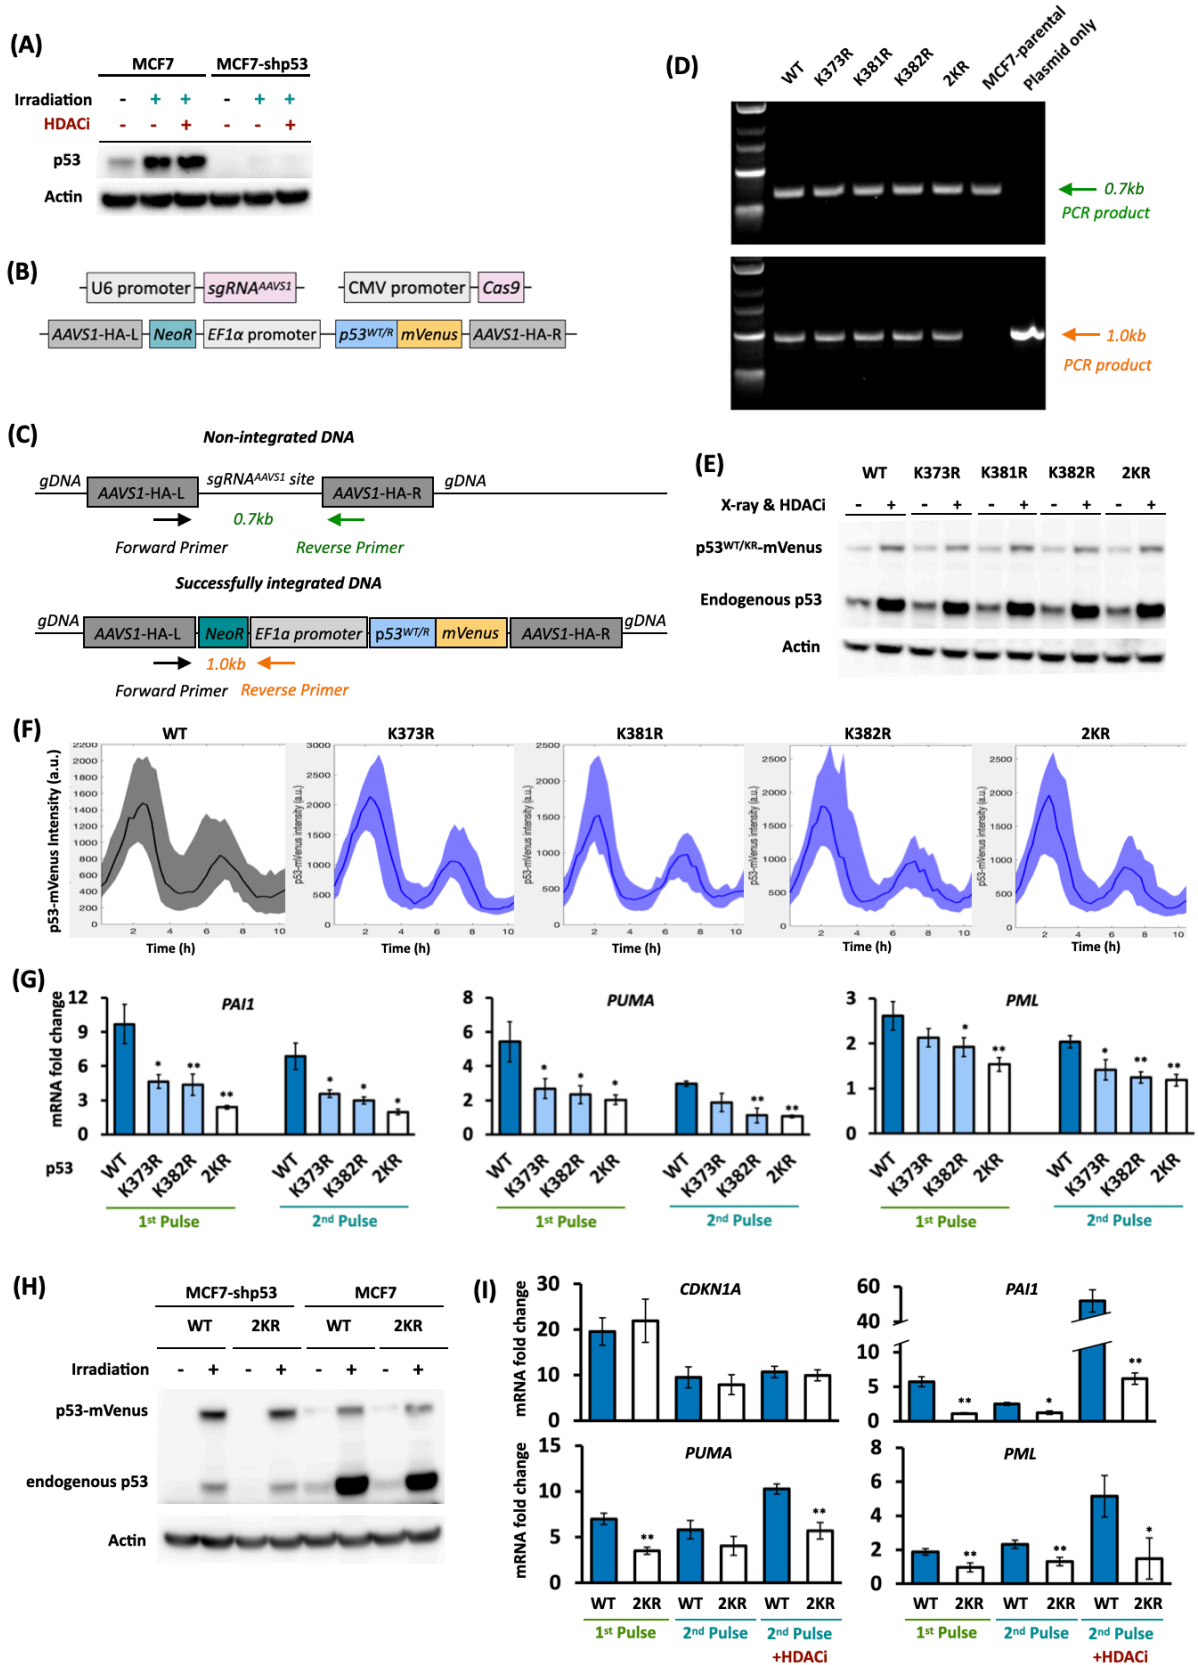

**Fig. S3: WT or mutant p53 cell line generation and resulting effects on p53 dynamics and target gene expression** (A) Western blot showing p53 levels at 7.5 hrs in control or shp53-expressing cells in the presence or absence of HDACi. Actin is shown as a loading control. (B) Design of plasmids used for CRISPR-Cas9 mediated knock-in of p53 variants into the genomic safe harbor site AAVS1. (C) Single cell clones were checked for successful integration of the construct into genomic DNA using the indicated primers. (D) PCR analysis of single cell clones harboring WT or mutant p53 constructs. Indicated bands depict expected products generated from PCR from panel B. Plasmid only refers to purified plasmid containing AAVS integration construct (lower panel from A) extracted from *E. coli* prior to transformation. (E) MCF7 cells expressing WT or mutant p53-fused to mVenus were subjected to 10 Gy X-ray and HDACi addition at 4.5 hrs following irradiation and their p53 levels analyzed by western blot 8 hrs post initial irradiation. (F) WT and mutant p53 levels were monitored by live cell fluorescence microscopy. Solid line represents the median while shaded area represents interquartile range. (G) qPCR analysis of the mRNA levels of the indicated genes at 3 and 8 hrs post-irradiation of WT or indicated mutant p53 expressing MCF7 cells, normalized to mRNA levels for unirradiated cells. Error bars represent standard deviation from 3 biological replicates. \*  $p < 0.05$ , \*\*  $p < 0.01$  by t-test. (H) MCF7 or MCF7-shp53 cells expressing WT or mutant p53-fused to mVenus were subjected or not to 10 Gy X-ray and their p53 levels analyzed by western blot 2.5 hrs post initial irradiation. (I) qPCR analysis of the mRNA levels of the indicated genes at 3 and 8 hrs post-irradiation with or without the addition of HDACi in WT or 2KR mutant p53-expressing MCF7-shp53 cells, normalized to mRNA levels for unirradiated cells. Error bars represent standard deviation from 3 biological replicates. \*  $p < 0.05$ , \*\*  $p < 0.01$  by t-test.

**Figure S4**

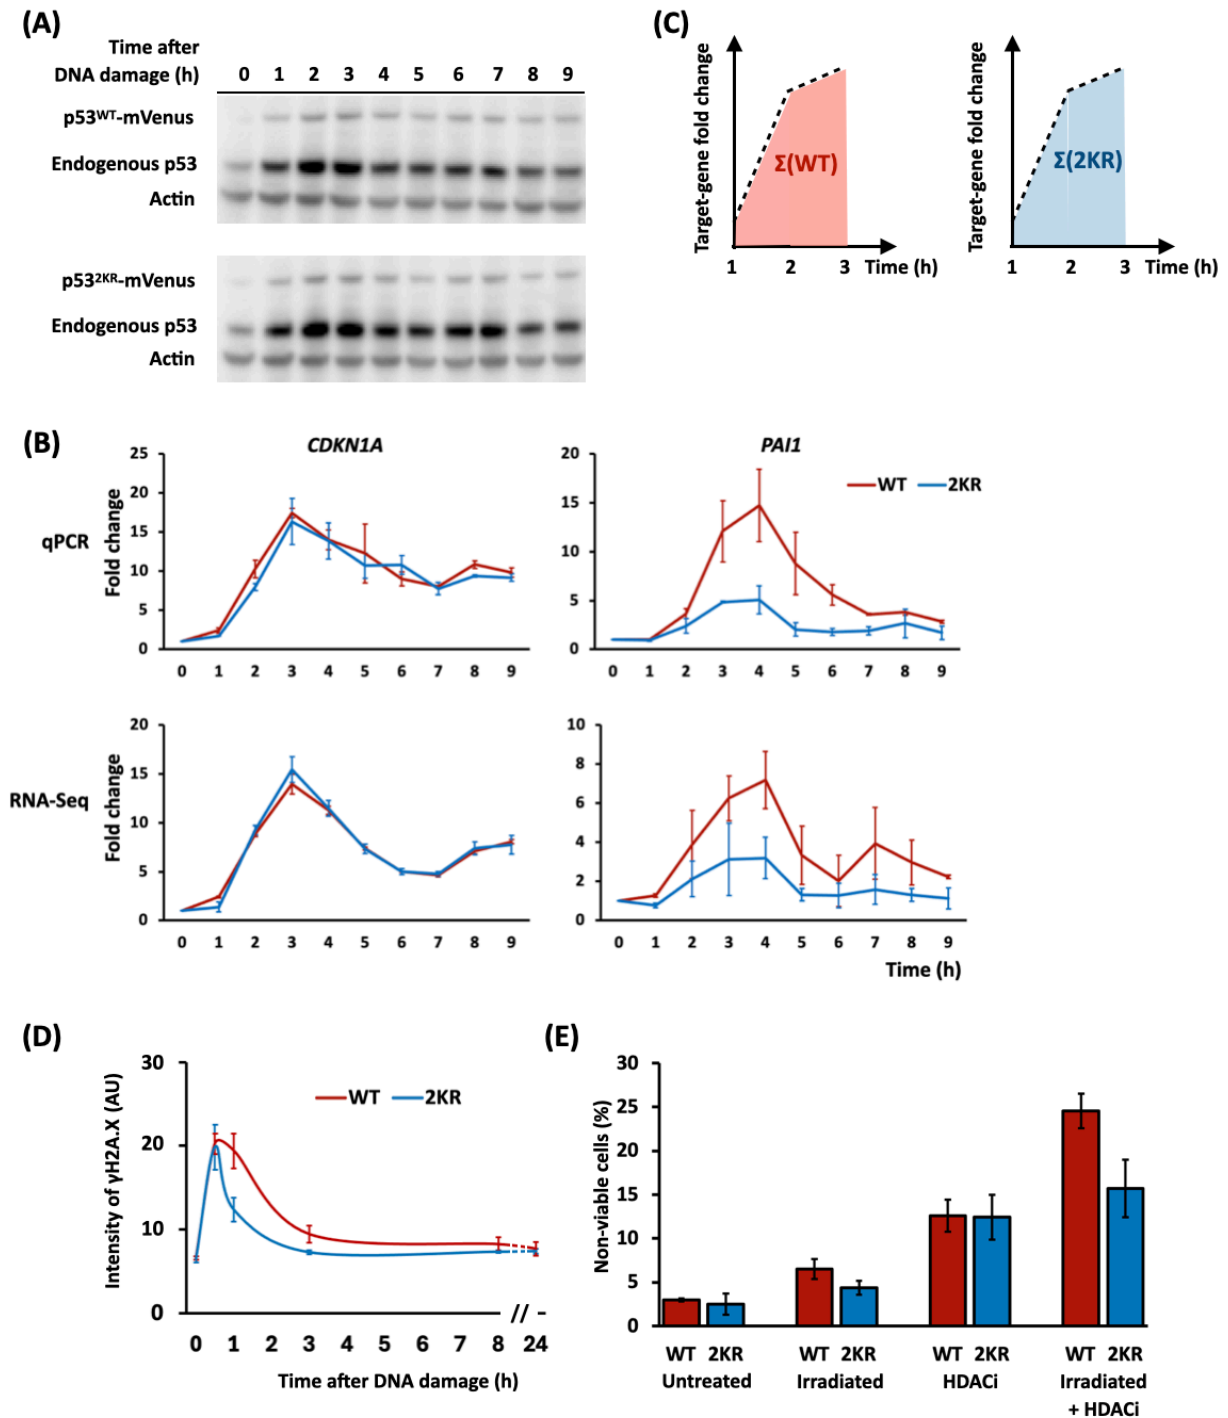

**Fig. S4: Expression of WT and 2KR p53 and their effects on gene expression, DNA repair, and viability (A) Western-blot of cells expressing WT (top) or 2KR (bottom) p53-Venus fusions at the indicated timepoints following irradiation. Endogenous and exogenous p53 are indicated.**

Actin is shown as a loading control. **(B)** qPCR analyses show same expression trends as RNA-Seq for the p53 targets *CDKN1A* and *PAIL1*. **(C)** Schematic showing the calculation of the area under the curve for dynamic gene expression data (See Materials & Methods). **(D)** Quantification of mean  $\gamma$ H2A.X intensity of top 10% p53-Venus expressing cells following irradiation. n >100 cells per condition per time point, error bars indicate standard deviation. **(E)** Cell viabilities were measured (detailed in Materials and Methods) by Trypan blue staining of WT and mutant p53-expressing MCF7 subjected to the indicated treatments. \* p < 0.05, by t-test (n = 3 biological replicates per condition)

**Table S1 (.csv file):** Normalized enrichment score (NES) and p-values for each gene ontology (GO) function was calculated (detailed in Materials & Methods). NA represents situations where no gene within a given GO category was detectable at a given time point.



## REFERENCES AND NOTES

1. M. Behar, A. Hoffmann, Understanding the temporal codes of intra-cellular signals. *Curr. Opin. Genet. Dev.* **20**, 684–693 (2010).
2. J. E. Purvis, G. Lahav, Encoding and decoding cellular information through signaling dynamics. *Cell* **152**, 945–956 (2013).
3. P. Beltrao, P. Bork, N. J. Krogan, V. van Noort, Evolution and functional cross-talk of protein post-translational modifications. *Mol. Syst. Biol.* **9**, 714 (2013).
4. S. Prabakaran, G. Lippens, H. Steen, J. Gunawardena, Post-translational modification: Nature's escape from genetic imprisonment and the basis for dynamic information encoding. *Wiley Interdiscip. Rev. Syst. Biol. Med.* **4**, 565–583 (2012).
5. K. T. Biegging, L. D. Attardi, Deconstructing p53 transcriptional networks in tumor suppression. *Trends Cell Biol.* **22**, 97–106 (2012).
6. A. M. Kaiser, L. D. Attardi, Deconstructing networks of p53-mediated tumor suppression in vivo. *Cell Death Differ.* **25**, 93–103 (2018).
7. J.-P. Kruse, W. Gu, Modes of p53 regulation. *Cell* **137**, 609–622 (2009).
8. D. W.-C. Li, J.-P. Liu, P. C. Schmid, R. Schlosser, H. Feng, W.-B. Liu, Q. Yan, L. Gong, S.-M. Sun, M. Deng, Y. Liu, Protein serine/threonine phosphatase-1 dephosphorylates p53 at Ser-15 and Ser-37 to modulate its transcriptional and apoptotic activities. *Oncogene* **25**, 3006–3022 (2006).
9. R. Kumari, S. Kohli, S. Das, p53 Regulation upon genotoxic stress: Intricacies and complexities. *Mol. Cell. Oncol.* **1**, e969653 (2014).
10. K. Oda, H. Arakawa, T. Tanaka, K. Matsuda, C. Tanikawa, T. Mori, H. Nishimori, K. Tamai, T. Tokino, Y. Nakamura, Y. Taya, p53AIP1, A potential mediator of p53-dependent apoptosis, and its regulation by Ser-46-phosphorylated p53. *Cell* **102**, 849–862 (2000).

11. C. Rinaldo, A. Prodosmo, F. Mancini, S. Iacovelli, A. Sacchi, F. Moretti, S. Soddu, MDM2-regulated degradation of HIPK2 prevents p53Ser46 phosphorylation and DNA damage-induced apoptosis. *Mol. Cell* **25**, 739–750 (2007).
12. Y. Tang, J. Luo, W. Zhang, W. Gu, Tip60-dependent acetylation of p53 modulates the decision between cell-cycle arrest and apoptosis. *Mol. Cell* **24**, 827–839 (2006).
13. S. M. Sykes, H. S. Mellert, M. A. Holbert, K. Li, R. Marmorstein, W. S. Lane, S. B. McMahon, Acetylation of the p53 DNA-binding domain regulates apoptosis induction. *Mol. Cell* **24**, 841–851 (2006).
14. S. Roy, M. Tenniswood, Site-specific acetylation of p53 directs selective transcription complex assembly. *J. Biol. Chem.* **282**, 4765–4771 (2007).
15. C. D. Knights, J. Catania, S. D. Giovanni, S. Muratoglu, R. Perez, A. Swartzbeck, A. A. Quong, X. Zhang, T. Beerman, R. G. Pestell, M. L. Avantaggiati, Distinct p53 acetylation cassettes differentially influence gene-expression patterns and cell fate. *J. Cell Biol.* **173**, 533–544 (2006).
16. S. M. Reed, D. E. Quelle, p53 Acetylation: Regulation and consequences. *Cancer* **7**, 30–69 (2015).
17. C. Chao, Z. Wu, S. J. Mazur, H. Borges, M. Rossi, T. Lin, J. Y. J. Wang, C. W. Anderson, E. Appella, Y. Xu, Acetylation of mouse p53 at lysine 317 negatively regulates p53 apoptotic activities after DNA damage. *Mol. Cell. Biol.* **26**, 6859–6869 (2006).
18. G. Lahav, N. Rosenfeld, A. Sigal, N. Geva-Zatorsky, A. J. Levine, M. B. Elowitz, U. Alon, Dynamics of the p53-Mdm2 feedback loop in individual cells. *Nat. Genet.* **36**, 147–150 (2004).
19. N. Geva-Zatorsky, N. Rosenfeld, S. Itzkovitz, R. Milo, A. Sigal, E. Dekel, T. Yarnitzky, Y. Liron, P. Polak, G. Lahav, U. Alon, Oscillations and variability in the p53 system. *Mol. Syst. Biol.* **2**, 2006.0033 (2006).
20. J. E. Purvis, K. W. Karhohs, C. Mock, E. Batchelor, A. Loewer, G. Lahav, p53 Dynamics control cell fate. *Science* **336**, 1440–1444 (2012).

21. J. Stewart-Ornstein, G. Lahav, p53 Dynamics in response to DNA damage vary across cell lines and are shaped by efficiency of DNA repair and activity of the kinase ATM. *Sci. Signal.* **10** eaah6671 (2017).
22. A. Jiménez, D. Lu, M. Kalocsay, M. J. Berberich, P. Balbi, A. Jambhekar, G. Lahav, Time-series transcriptomics and proteomics reveal alternative modes to decode p53 oscillations. *Mol. Syst. Biol.* **18**, e10588 (2022).
23. J. O. Kafader, R. D. Melani, M. W. Senko, A. A. Makarov, N. L. Kelleher, P. D. Compton, Measurement of individual ions sharply increases the resolution of orbitrap mass spectra of proteins. *Anal. Chem.* **91**, 2776–2783 (2019).
24. B. Gu, W.-G. Zhu, Surf the post-translational modification network of p53 regulation. *Int. J. Biol. Sci.* **8**, 672–684 (2012).
25. C. J. DeHart, J. S. Chahal, S. J. Flint, D. H. Perlman, Extensive post-translational modification of active and inactivated forms of endogenous p53. *Mol. Cell. Proteomics* **13**, 1–17 (2014).
26. C. J. DeHart, L. Fornelli, L. C. Anderson, R. T. Fellers, D. Lu, C. L. Hendrickson, G. Lahav, J. Gunawardena, N. L. Kelleher, A multi-modal proteomics strategy for characterizing posttranslational modifications of tumor suppressor p53 reveals many sites but few modified forms. *bioRxiv* 455527 [Preprint] (2018); <https://doi.org/10.1101/455527>.
27. Y. Zhao, S. Lu, L. Wu, G. Chai, H. Wang, Y. Chen, J. Sun, Y. Yu, W. Zhou, Q. Zheng, M. Wu, G. A. Otterson, W.-G. Zhu, Acetylation of p53 at lysine 373/382 by the histone deacetylase inhibitor depsipeptide induces expression of p21Waf1/Cip1. *Mol. Cell. Biol.* **26**, 2782–2790 (2006).
28. L. Micheli, G. D'Andrea, L. Leonardi, F. Tirone, HDAC1, HDAC4, and HDAC9 bind to PC3/Tis21/Btg2 and are required for its inhibition of cell cycle progression and cyclin D1 expression. *J. Cell. Physiol.* **232**, 1696–1707 (2017).
29. K. T. Biegging, S. S. Mello, L. D. Attardi, Unravelling mechanisms of p53-mediated tumour suppression. *Nat. Rev. Cancer* **14**, 359–370 (2014).

30. A. Loffreda, E. Jacchetti, S. Antunes, P. Rainone, T. Daniele, T. Morisaki, M. E. Bianchi, C. Tacchetti, D. Mazza, Live-cell p53 single-molecule binding is modulated by C-terminal acetylation and correlates with transcriptional activity. *Nat. Commun.* **8**, 313 (2017).
31. T. G. Hofmann, A. Möller, H. Sirma, H. Zentgraf, Y. Taya, W. Dröge, H. Will, M. L. Schmitz, Regulation of p53 activity by its interaction with homeodomain-interacting protein kinase-2. *Nat. Cell Biol.* **4**, 1–10 (2002).
32. Y. Wang, Y. Chen, Q. Chen, X. Zhang, H. Wang, Z. Wang, J. Wang, C. Tian, The role of acetylation sites in the regulation of p53 activity. *Mol. Biol. Rep.* **47**, 381–391 (2020).
33. D. Friedrich, L. Friedel, A. Finzel, A. Herrmann, S. Preibisch, A. Loewer, Stochastic transcription in the p53-mediated response to DNA damage is modulated by burst frequency. *Mol. Syst. Biol.* **15**, e9068 (2019).
34. A. K. Panda, S. K. Nandi, A. Chakraborty, R. H. Nagaraj, A. Biswas, Differential role of arginine mutations on the structure and functions of  $\alpha$ -crystallin. *Biochim. Biophys. Acta* **1860**, 199–210 (2019).
35. S. Shin, S. H. Kim, S. W. Shin, L. M. Grav, L. E. Pedersen, J. S. Lee, G. M. Lee, Comprehensive analysis of genomic safe harbors as target sites for stable expression of the heterologous gene in HEK293 cells. *ACS Synth Biol* **9**, 1263–1269 (2020).
36. M. Fischer, Census and evaluation of p53 target genes. *Oncogene* **36**, 3943–3956 (2017).
37. A. Hafner, J. Stewart-Ornstein, J. E. Purvis, W. C. Forrester, M. L. Bulyk, G. Lahav, p53 pulses lead to distinct patterns of gene expression albeit similar DNA-binding dynamics. *Nat. Struct. Mol. Biol.* **24**, 840–847 (2017).
38. M. Fischer, L. Steiner, K. Engeland, The transcription factor p53: Not a repressor, solely an activator. *Cell Cycle* **13**, 3037–3058 (2014).

39. K. Kozyrska, G. Pilia, M. Vishwakarma, L. Wagstaff, M. Goschorska, S. Cirillo, S. Mohamad, K. Gallacher, R. E. Carazo Salas, E. Piddini, p53 Directs leader cell behavior, migration, and clearance during epithelial repair. *Science* **375**, eab18876 (2022).
40. P. L. Vaddavalli, B. Schumacher, The p53 network: Cellular and systemic DNA damage responses in cancer and aging. *Trends Genet.* **38**, 598–612 (2022).
41. J. R. Porter, B. E. Fisher, E. Batchelor, p53 Pulses diversify target gene expression dynamics in an mRNA half-life-dependent manner and delineate co-regulated target gene subnetworks. *Cell Syst.* **2**, 272–282 (2016).
42. J. Reyes, J.-Y. Chen, J. Stewart-Ornstein, K. W. Karhohs, C. S. Mock, G. Lahav, Fluctuations in p53 signaling allow escape from cell-cycle arrest. *Mol. Cell* **71**, 581–591.e5 (2018).
43. Y. Tang, W. Zhao, Y. Chen, Y. Zhao, W. Gu, Acetylation is indispensable for p53 activation. *Cell* **133**, 612–626 (2008).
44. P. L. Leslie, D. A. Franklin, Y. Liu, Y. Zhang, p53 Regulates the expression of LRP1 and apoptosis through a stress intensity-dependent microRNA feedback loop. *Cell Rep.* **24**, 1484–1495 (2018).
45. G. Zimmermann, W. Ackermann, H. Alexander, Expression and production of human chorionic gonadotropin (hCG) in the normal secretory endometrium: Evidence of *CGB7* and/or *CGB6* beta hCG subunit gene expression. *Biol. Reprod.* **86**, 87 (2012).
46. X. Mu, P. J. Higgins, Differential growth state-dependent regulation of plasminogen activator inhibitor type-1 expression in senescent IMR-90 human diploid fibroblasts. *J. Cell. Physiol.* **165**, 647–657 (1995).
47. J. Fu, Y. Zhang, M. Wang, J. Hu, Y. Fang, Inhibition of the long non-coding RNA UNC5B-AS1/miR-4455/RSPO4 axis reduces cervical cancer growth in vitro and in vivo. *J. Gene Med.* **23**, e3382 (2021).

48. K.-A. Kim, M. Wagle, K. Tran, X. Zhan, M. A. Dixon, S. Liu, D. Gros, W. Korver, S. Yonkovich, N. Tomasevic, M. Binnerts, A. Abo, R-Spondin family members regulate the Wnt pathway by a common mechanism. *Mol. Biol. Cell* **19**, 2588–2596 (2008).
49. H. Liu, Z. S. Juo, A. H.-R. Shim, P. J. Focia, X. Chen, K. C. Garcia, X. He, Structural basis of semaphorin-plexin recognition and viral mimicry from Sema7A and A39R complexes with plexinC1. *Cell* **142**, 749–761 (2010).
50. Y. Rochman, R. Spolski, W. J. Leonard, New insights into the regulation of T cells by gamma(c) family cytokines. *Nat. Rev. Immunol.* **9**, 480–90 (2009).
51. V. A. Gupta, A. H. Beggs, Kelch proteins: Emerging roles in skeletal muscle development and diseases. *Skelet. Muscle* **4**, 11 (2014).
52. W.-H. Lin, C.-J. Huang, M.-W. Liu, H.-M. Chang, Y.-J. Chen, T.-Y. Tai, L.-M. Chuang, Cloning, mapping, and characterization of the human sorbin and SH3 domain containing 1 (SORBS1) gene: A protein associated with c-Abl during insulin signaling in the hepatoma cell line Hep3B. *Genomics* **74**, 12–20 (2001).
53. N. Stenzel, C. P. Fetzter, R. Heumann, K. S. Erdmann, PDZ-domain-directed basolateral targeting of the peripheral membrane protein FRMPD2 in epithelial cells. *J. Cell Sci.* **122**, 3374–3384 (2009).
54. G. Zago, I. Veith, M. K. Singh, L. Fuhrmann, S. de Beco, A. Remorino, S. Takaoka, M. Palmeri, F. Berger, N. Brandon, A. el Marjou, A. Vincent-Salomon, J. Camonis, M. Coppey, M. C. Parrini, RalB directly triggers invasion downstream Ras by mobilizing the Wave complex. *eLife* **7**, e40474 (2018).
55. Q. J. Cheng, S. Ohta, K. M. Sheu, R. Spreafico, A. Adelaja, B. Taylor, A. Hoffmann, NF- $\kappa$ B dynamics determine the stimulus specificity of epigenomic reprogramming in macrophages. *Science* **372**, 1349–1353 (2021).
56. L.F. Chen, W. Fischle, E. Verdin, W. C. Greene, Duration of nuclear NF- $\kappa$ B action regulated by reversible acetylation. *Science* **293**, 1653–1657 (2001).

57. M. Faizi, R. T. Fellers, D. Lu, B. S. Drown, A. Jambhekar, G. Lahav, N. L. Kelleher, J. Gunawardena, MSModDetector: A tool for detecting mass shifts and post-translational modifications in individual ion mass spectrometry data. *bioRxiv* 2023.06.06.543961 [Preprint] (2023). <https://doi.org/10.1101/2023.06.06.543961>.
58. D. R. Stirling, M. J. Swain-Bowden, A. M. Lucas, A. E. Carpenter, B. A. Cimini, A. Goodman, CellProfiler 4: Improvements in speed, utility and usability. *BMC Bioinform.* **22**, 433 (2021).
59. A. Dobin, C. A. Davis, F. Schlesinger, J. Drenkow, C. Zaleski, S. Jha, P. Batut, M. Chaisson, T. R. Gingeras, STAR: Ultrafast universal RNA-seq aligner. *Bioinformatics* **29**, 15–21 (2013).
60. R. Patro, G. Duggal, M. I. Love, R. A. Irizarry, C. Kingsford, Salmon provides fast and bias-aware quantification of transcript expression. *Nat. Methods* **14**, 417–419 (2017).
61. M. I. Love, W. Huber, S. Anders, Moderated estimation of fold change and dispersion for RNA-seq data with DESeq2. *Genome Biol.* **15**, 550 (2014).
62. A. Subramanian, P. Tamayo, V. K. Mootha, S. Mukherjee, B. L. Ebert, M. A. Gillette, A. Paulovich, S. L. Pomeroy, T. R. Golub, E. S. Lander, J. P. Mesirov, Gene set enrichment analysis: A knowledge-based approach for interpreting genome-wide expression profiles. *Proc. Natl. Acad. Sci. U.S.A.* **102**, 15545–15550 (2005).
